# Supplementary material for: Exploration of a novel geoengineering solution: lighting up tropical forests at night
Source: Copernicus journal article supplement (doi:10.5194/esd-2021-85), 2021-11-04

**Fig. S1.** Global surface downward shortwave radiation for 24 hours since the start of the nighttime lighting experiment at 12:00 am January 1st 2015 (UTC time) under  $200\text{W/m}^2$  nighttime lighting power.

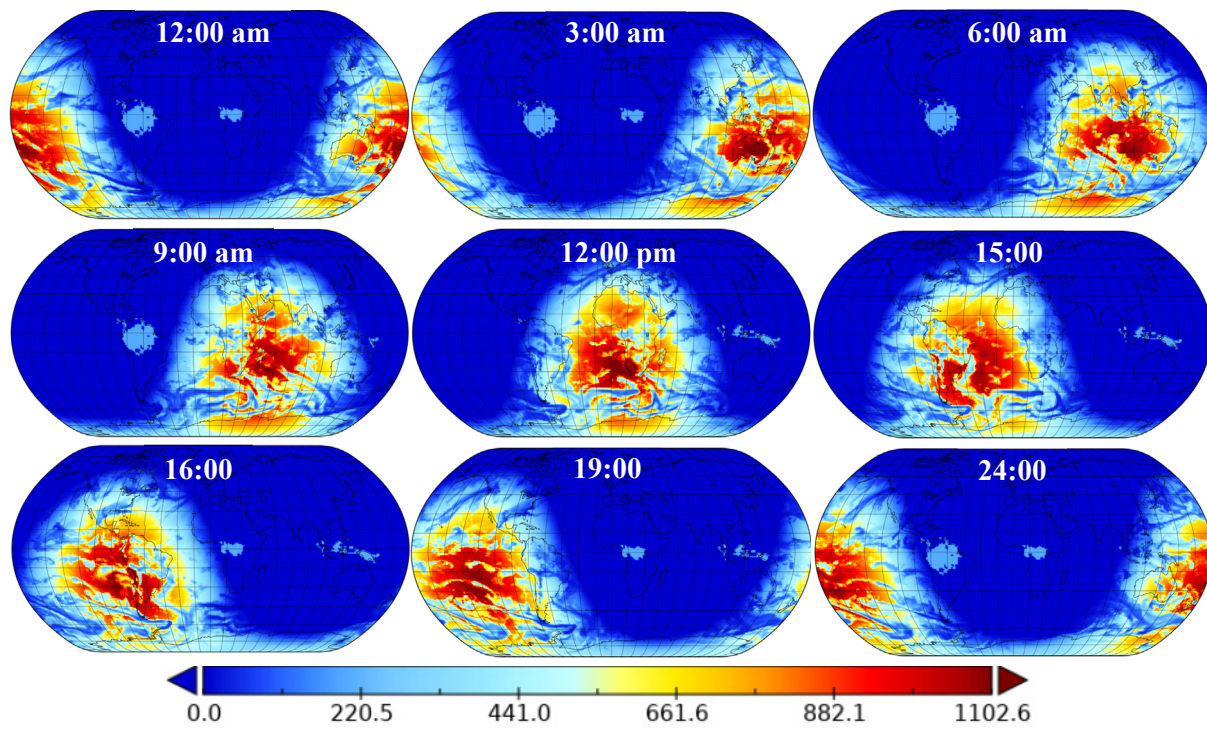

**Fig. S2.** 24-hour African Tropical Forest Responses

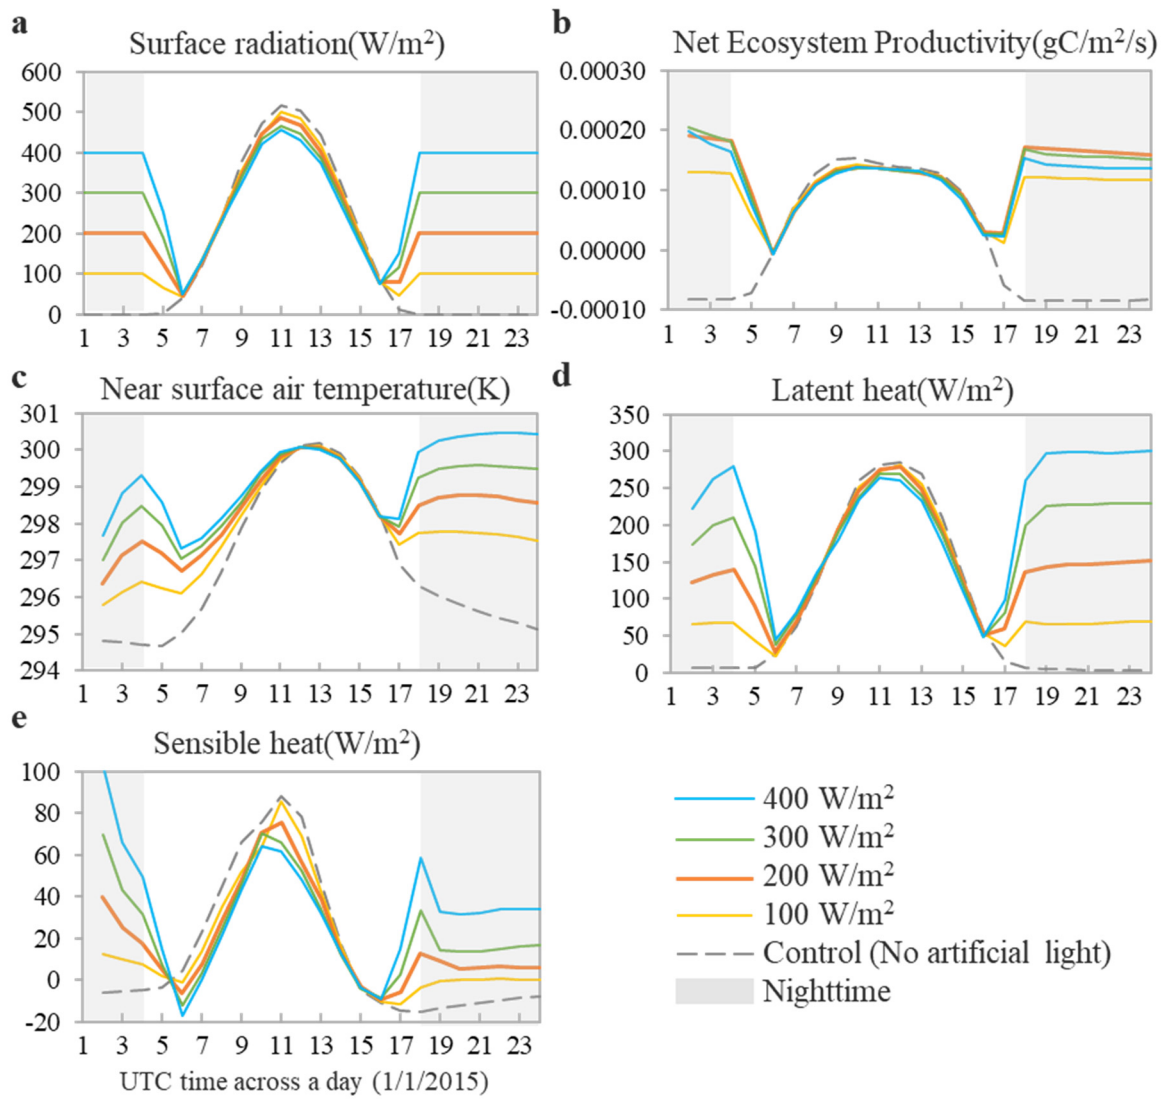

**Fig. S3.** 24-hour Asian Tropical Forest Responses

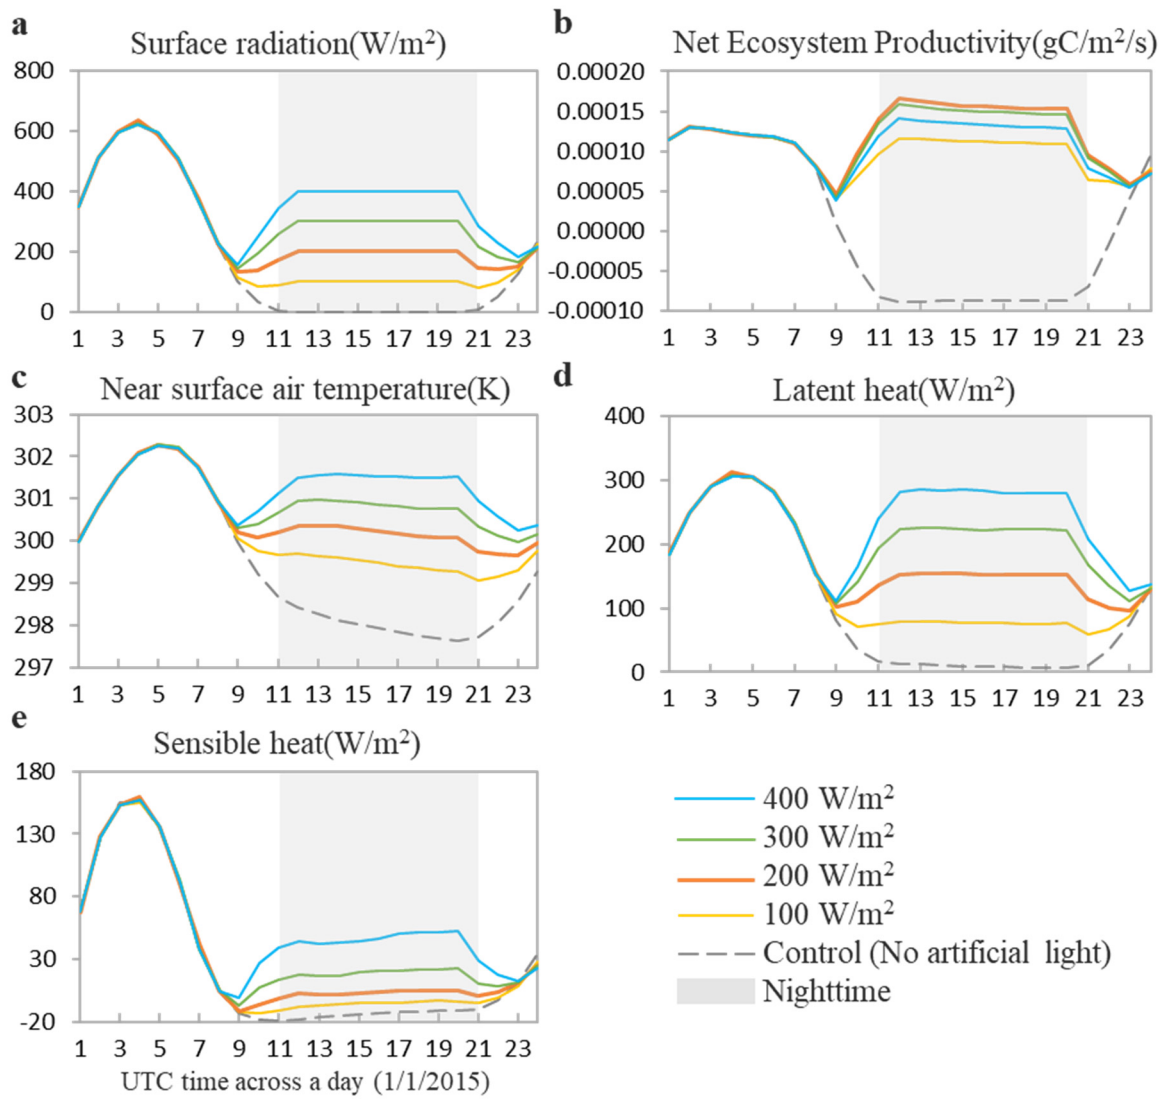

**Fig. S4.** Seasonal pattern of tropical forests air temperature and precipitation increase under the lighting experiment.

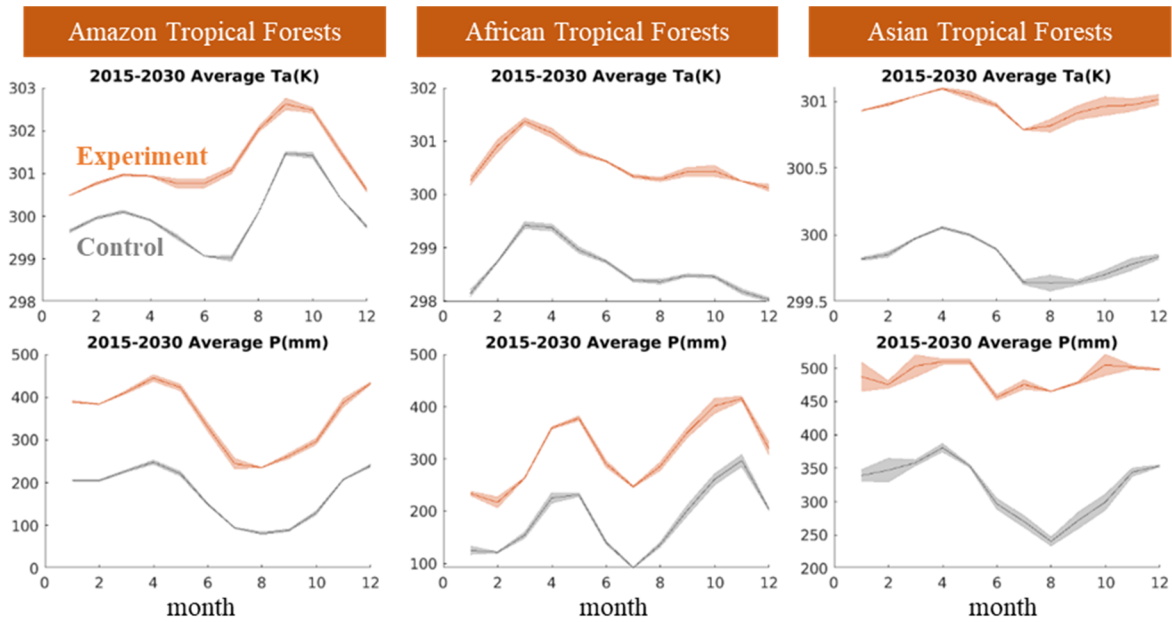

**Fig. S5. Amazonian Tropical Forest Carbon Flux, Carbon Amount, and Climate Responses.** CL in panel (j): coarse woody debris and litter.

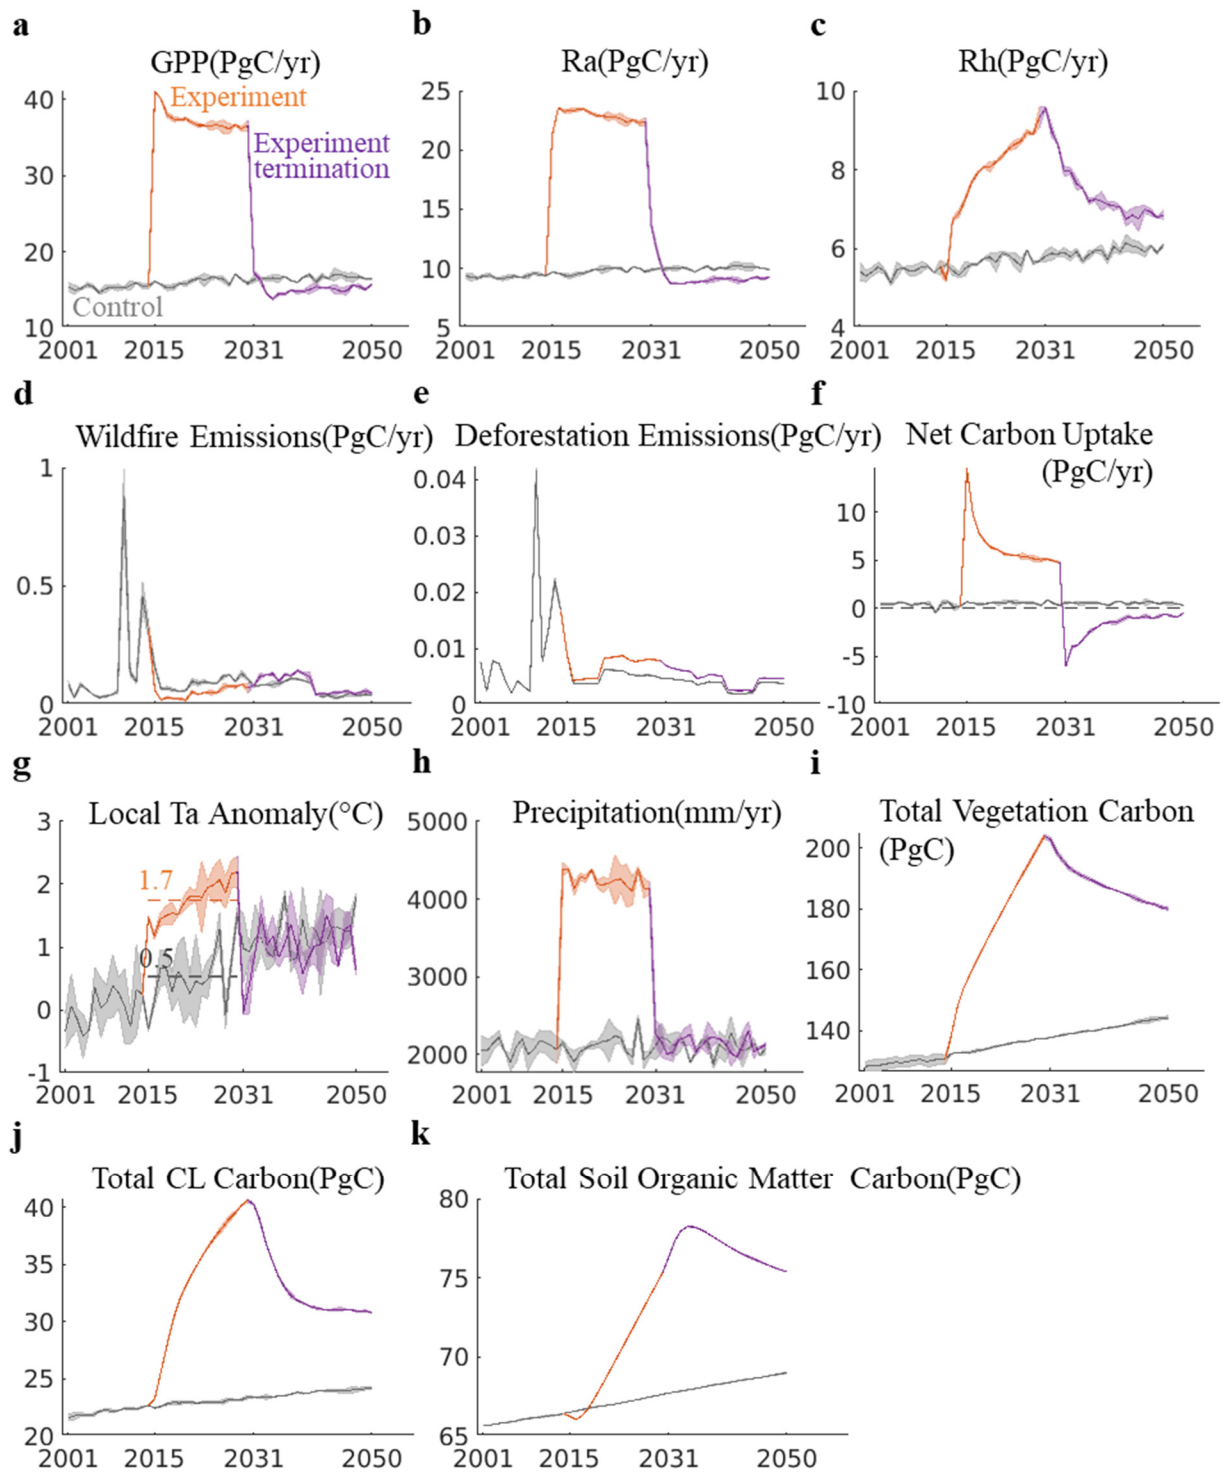

**Fig. S6.** African Tropical Forest Carbon Flux, Carbon Amount, and Climate Responses. CL in panel (j): coarse woody debris and litter.

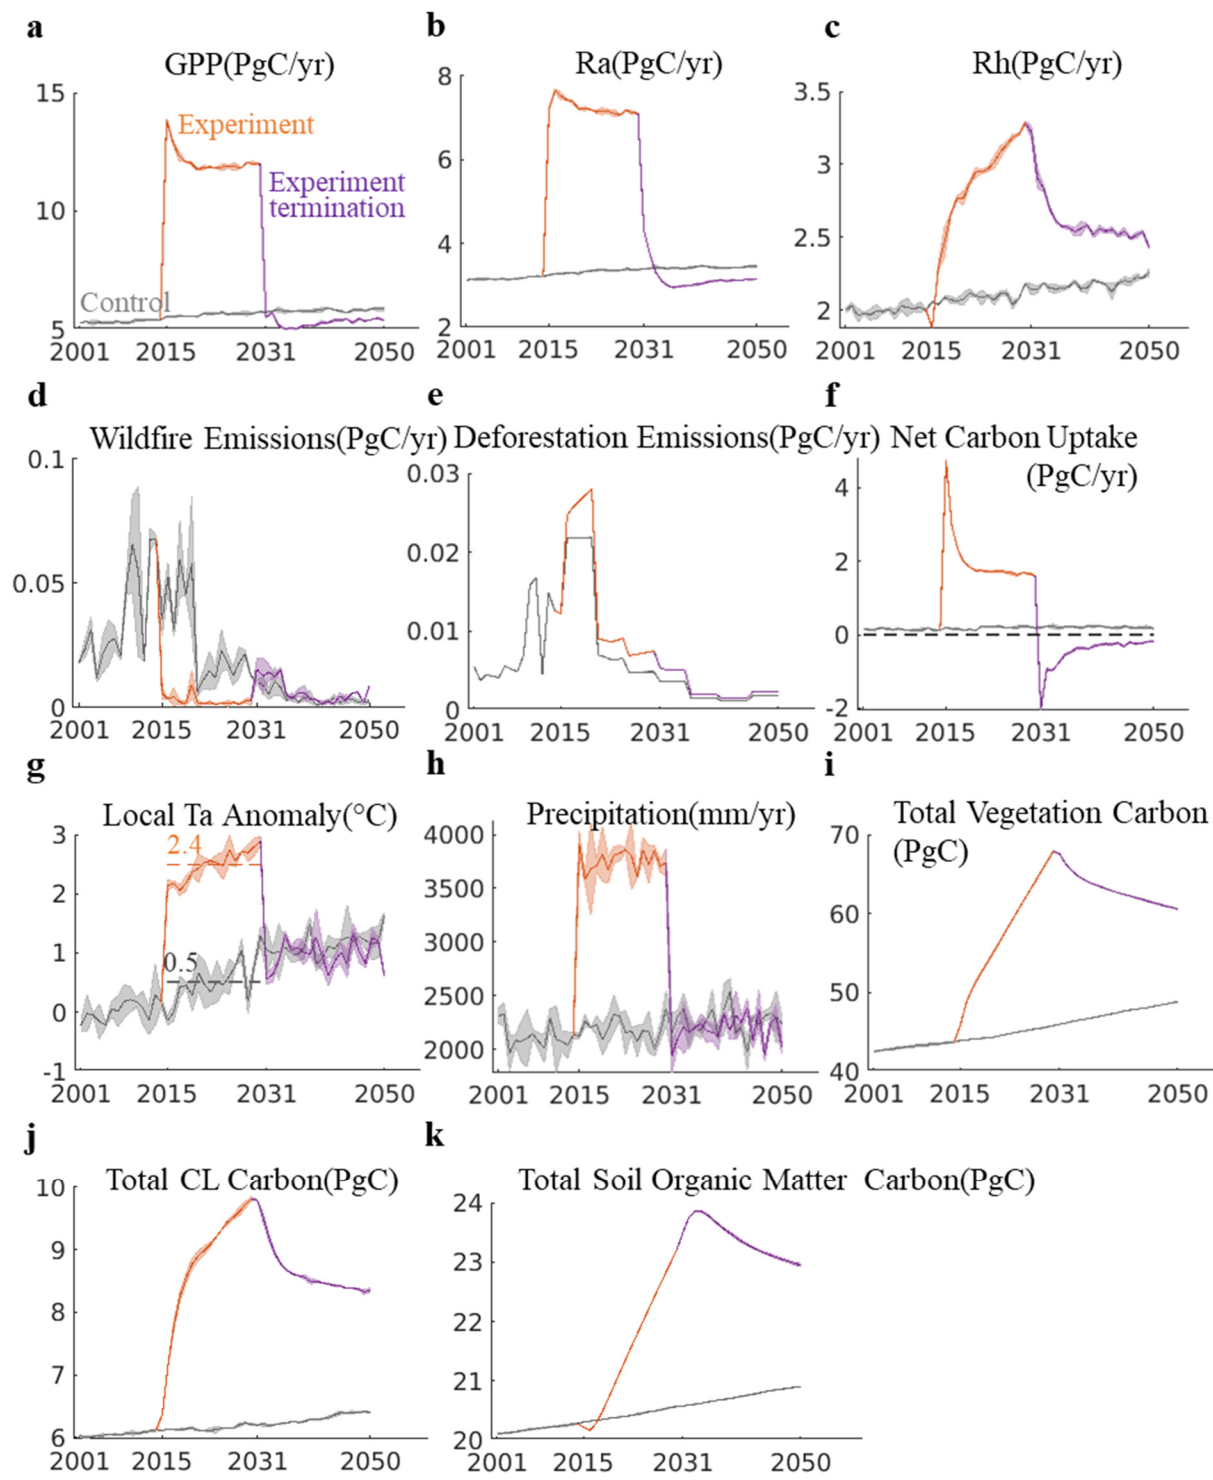



**Fig. S7.** Asian Tropical Forest Carbon Flux, Carbon Amount, and Climate Responses. CL in panel (j): coarse woody debris and litter.

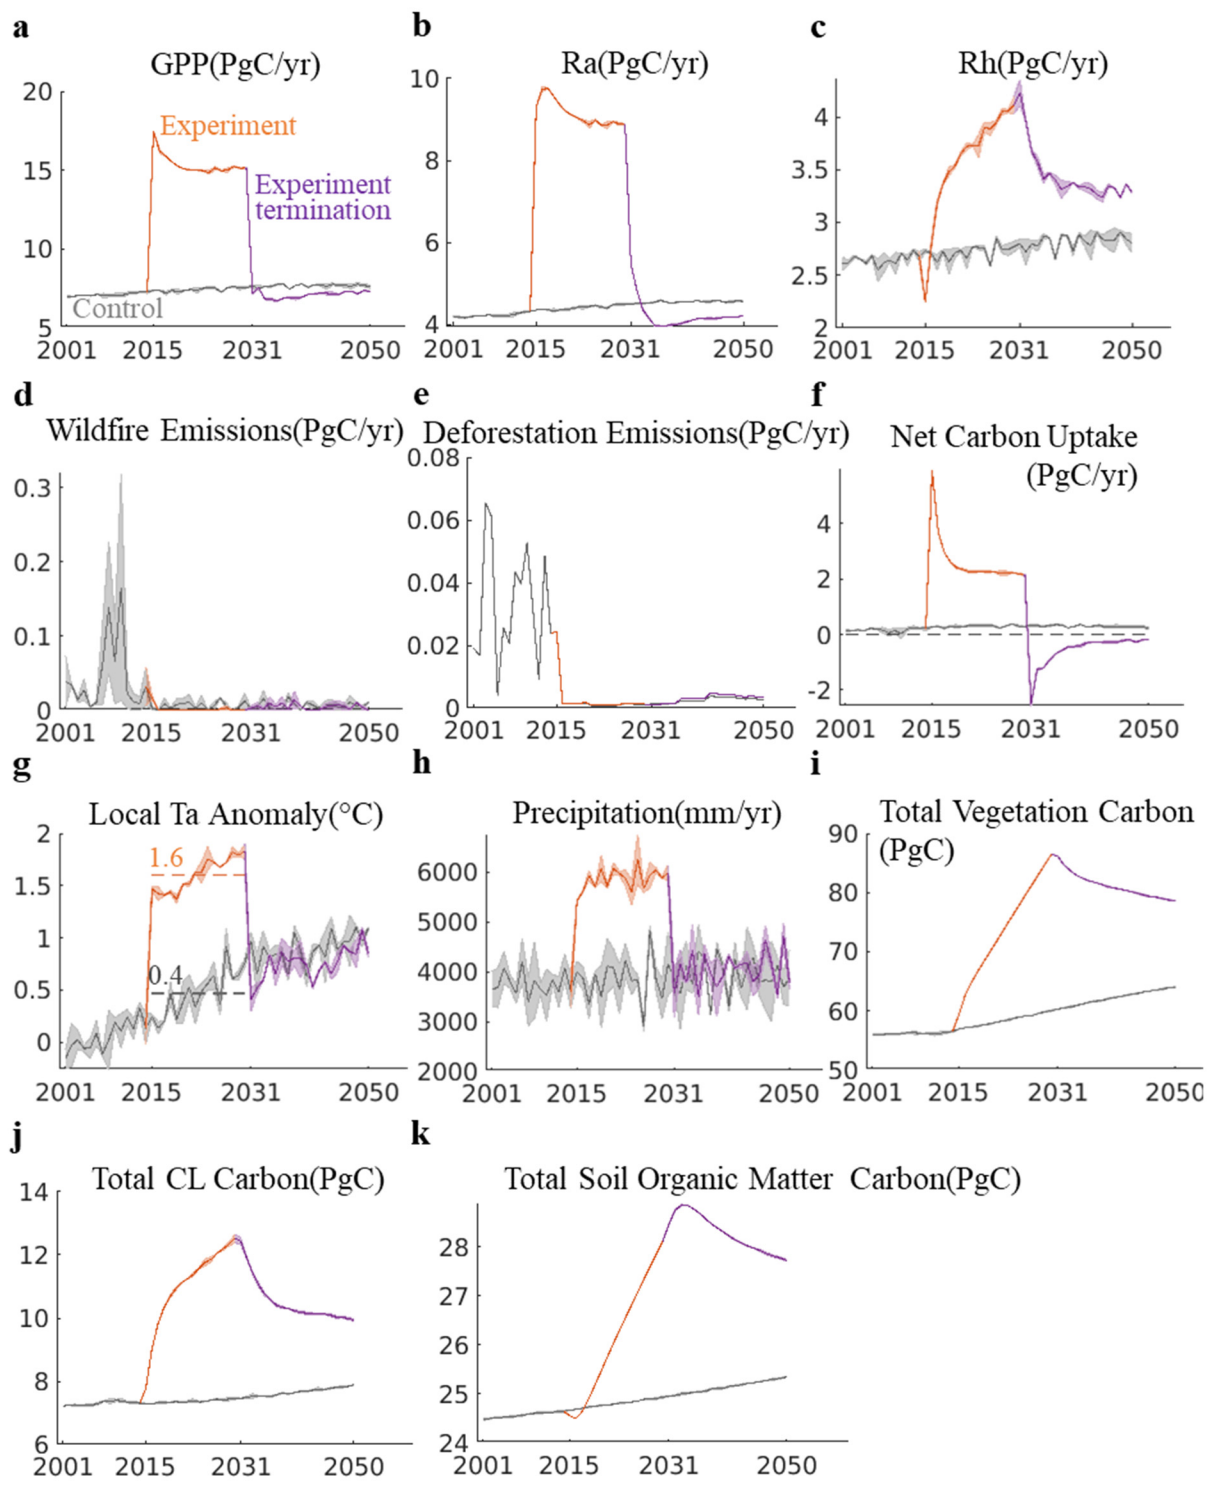

Supplement: Supplementary file 1 [file esd-2021-85-supplement.pdf]
