# Supplementary material for: Exploration of a novel geoengineering solution: lighting up tropical forests at night
Source: Copernicus journal article supplement (doi:10.5194/esd-2021-85), 2021-11-04

24-hour Amazonian Tropical Forest Soil Moisture Changes under Control Simulation. Soil moisture here represents the mass of water in the 10cm soil surface.

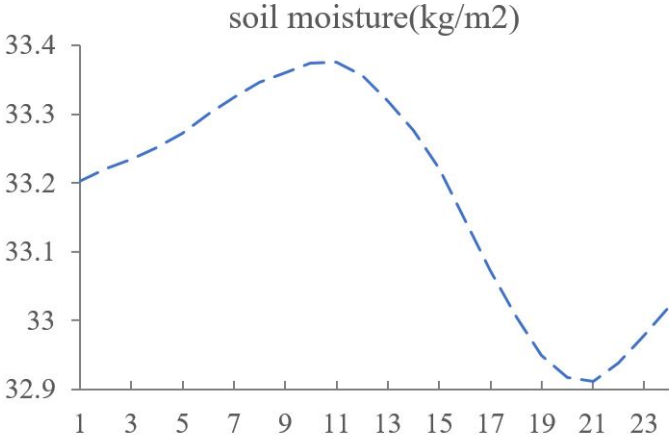

Global Tropical Forest Soil Moisture Responses

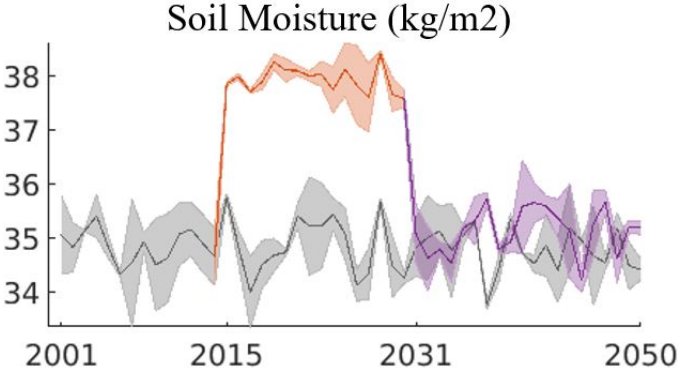

Supplement: Supplementary file [file esd-2021-85-AC3-supplement.pdf]
